# Supplementary material for: Prevalence of vitamin D and calcium deficiencies and their health impacts on women of childbearing age: a protocol for systematic review and meta-analysis
Source: HighWire-hosted journal article supplement (doi:10.1136/bmjopen-2021-049731), 2022-05-01
Supplement: bmjopen-2021-049731supp001_data_supplement.pdf [file bmjopen-2021-049731supp001_data_supplement.pdf]

**Supplementary Table.** Search terms selected according to specific nomenclature for each database

|                       |                                                                                                                                                                                                                                                                                                                                                                                                                                                                                                                                                                                                                                                                                                                                                                                                                                                                                                                                                                                                                                                                                                                                                                                                                                                                                                                                                                                                                                                                                                      |
|-----------------------|------------------------------------------------------------------------------------------------------------------------------------------------------------------------------------------------------------------------------------------------------------------------------------------------------------------------------------------------------------------------------------------------------------------------------------------------------------------------------------------------------------------------------------------------------------------------------------------------------------------------------------------------------------------------------------------------------------------------------------------------------------------------------------------------------------------------------------------------------------------------------------------------------------------------------------------------------------------------------------------------------------------------------------------------------------------------------------------------------------------------------------------------------------------------------------------------------------------------------------------------------------------------------------------------------------------------------------------------------------------------------------------------------------------------------------------------------------------------------------------------------|
| <b>MEDLINE</b>        | (("Micronutrients" [Title/Abstract] OR "Micronutrients" [MeSH Terms] OR "Deficiency Diseases" [Title/Abstract] OR "Deficiency Diseases" [MeSH Terms] OR "Avitaminosis" [Title/Abstract] OR "Avitaminosis" [MeSH Terms] OR "Deficiencies vitamin" [Title/Abstract] OR "Deficiencies vitamin" [MeSH Terms] OR "Deficiency vitamin" [Title/Abstract] OR "Vitamin deficiency" [Title/Abstract] OR "Vitamin Deficiencies" [Title/Abstract] OR "Serum Levels" [Title/Abstract] OR "Nutritional Status" [Title/Abstract] OR "Nutritional Status" [MeSH Terms] OR "Reduced Level" [Title/Abstract] OR "Reduced Level" [MeSH Terms]) AND ("Women" [Title/Abstract] OR "Women" [MeSH Terms] OR "Girl" [Title/Abstract] OR "Girls" [Title/Abstract] OR "Woman" [Title/Abstract] OR "Adolescent" [Title/Abstract] OR "Adolescent" [MeSH Terms] OR "Teen" [Title/Abstract] OR "Teens" [Title/Abstract] OR "Teenager" [Title/Abstract] OR "Pregnancy" [Title/Abstract] OR "Pregnancy" [MeSH Terms] OR "Gestation" [Title/Abstract] OR "Pregnancies" [Title/Abstract]) AND ("Vitamin D" [Title/Abstract] OR "Vitamin D" [MeSH Term] OR "Vitamin D Deficiency" [Title/Abstract] OR "Vitamin D Deficiency" [MeSH Term] OR "deficiencies vitamin d" [Title/Abstract] OR "Vitamin D Deficiencies" [Title/Abstract] OR "Vitamin D Deficiencies" [MeSH Term] OR "Calcium" [Title/Abstract] OR "Calcium" [MeSH Term] OR "Hypocalcemia" [Title/Abstract] OR "Hypocalcemia" [MeSH Term] OR "Hypocalcemias" [Title/Abstract]) |
| <b>Embase</b>         | ('micronutrients':ab,ti OR 'deficiency diseases':ab,ti OR 'avitaminosis':ab,ti OR 'avitaminoses':ab,ti OR 'deficiencies vitamin':ab,ti OR 'deficiency vitamin':ab,ti OR 'vitamin deficiency':ab,ti OR 'vitamin deficiencies':ab,ti OR 'serum levels':ab,ti OR 'nutritional status':ab,ti OR 'reduced level':ab,ti) AND ('women':ab,ti OR 'girl':ab,ti OR 'girls':ab,ti OR 'woman':ab,ti OR 'adolescent':ab,ti OR 'teen':ab,ti OR 'teens':ab,ti OR 'teenager':ab,ti OR 'pregnancy':ab,ti OR 'gestation':ab,ti OR 'pregnancies':ab,ti) AND ('vitamin d':ab,ti OR 'vitamin d deficiency':ab,ti OR 'deficiencies vitamin d':ab,ti OR 'vitamin d deficiencies':ab,ti OR 'calcium':ab,ti OR 'hypocalcemia':ab,ti OR 'hypocalcemias':ab,ti)                                                                                                                                                                                                                                                                                                                                                                                                                                                                                                                                                                                                                                                                                                                                                                 |
| <b>Scopus</b>         | ( TITLE-ABS ("Micronutrients" OR "Deficiency Diseases" OR "Avitaminosis" OR "Avitaminoses" OR "Deficiencies, Vitamin" OR "Deficiency Vitamin" OR "Vitamin Deficiency" OR "Vitamin Deficiencies" OR "Serum Levels" OR "Nutritional Status" OR "Reduced Level") ) AND ( TITLE-ABS ("Women" OR "Girl" OR "Girls" OR "Woman" OR "Adolescent" OR "Teen" OR "Teens" OR "Teenager" OR "Pregnancy" OR "Gestation" OR "Pregnancies") ) AND ( TITLE-ABS ("Vitamin D" OR "Vitamin D Deficiency" OR "Deficiencies, Vitamin D" OR "Vitamin D Deficiencies" OR "Calcium" OR "Hypocalcemia" OR "Hypocalcemias") )                                                                                                                                                                                                                                                                                                                                                                                                                                                                                                                                                                                                                                                                                                                                                                                                                                                                                                   |
| <b>Web of Science</b> | (TI= "Micronutrients" OR AB= "Micronutrients" OR TI="Deficiency Diseases" OR AB= "Deficiency Diseases" OR TI= "Avitaminosis" OR AB= "Avitaminosis" OR TI= "Avitaminoses" OR AB= "Avitaminoses" OR TI= "deficiencies vitamin" OR AB= "deficiencies vitamin" OR TI= "Deficiency Vitamin" OR AB= "Deficiency Vitamin" OR TI= "Vitamin Deficiency" OR AB="Vitamin Deficiency" OR TI= "Vitamin Deficiencies" OR AB="Vitamin Deficiencies" OR TI= "Serum Levels" OR AB= "Serum Levels" OR TI="Nutritional Status" OR AB="Nutritional Status" OR TI="Reduced Level" OR AB="Reduced Level") AND (TI="Women" OR AB= "Women" OR TI="Girl" OR AB="Girl" OR TI="Girls" OR AB="Girls")                                                                                                                                                                                                                                                                                                                                                                                                                                                                                                                                                                                                                                                                                                                                                                                                                            |

|               |                                                                                                                                                                                                                                                                                                                                                                                                                                                                                                                                                                                                                                                            |
|---------------|------------------------------------------------------------------------------------------------------------------------------------------------------------------------------------------------------------------------------------------------------------------------------------------------------------------------------------------------------------------------------------------------------------------------------------------------------------------------------------------------------------------------------------------------------------------------------------------------------------------------------------------------------------|
|               | <p>OR TI="Woman" OR AB="Woman" OR TI="Adolescent" OR AB= "Adolescent" OR TI="Teen" OR AB="Teen" OR TI="Teens" OR AB="Teens" OR TI="Teenager" OR AB="Teenager" OR TI="Pregnancy" OR AB="Pregnancy" OR TI="Gestation" OR AB="Gestation" OR TI="Pregnancies" OR AB="Pregnancies") AND (TI="Vitamin D" OR AB="Vitamin D" OR TI="Vitamin D Deficiency" OR AB= "Vitamin D Deficiency" OR TI="deficiencies vitamin d" OR AB="deficiencies vitamin d" OR TI="Vitamin D Deficiencies" OR AB="Vitamin D Deficiencies" OR TI="Calcium" OR AB="Calcium" OR TI="Hypocalcemia" OR AB= "Hypocalcemia" OR TI="Hypocalcemias" OR AB="Hypocalcemias")</p>                    |
| <b>LILACS</b> | <p>(tw:(tw:(("Micronutrients")) OR (tw:(("Deficiency Diseases")) OR (tw:(("Avitaminosis")) OR (tw:(("Avitaminoses")) OR (tw:(("deficiencies vitamin")) OR (tw:(("Deficiency Vitamin")) OR (tw:(("Vitamin Deficiency")) OR (tw:(("Vitamin Deficiencies")) OR (tw:(("Serum Levels")) OR (tw:(("Nutritional Status")) OR (tw:(("Reduced Level")))))))) AND (tw:(Women OR Girl OR Girls OR Woman OR Adolescent OR Teen OR Teens OR Teenager OR Pregnancy OR Gestation OR Pregnancies )) AND (tw:(("Vitamin D") OR ("Vitamin D Deficiency") OR ("deficiencies vitamin d") OR ("Vitamin D Deficiencies") OR "Calcium" OR "Hypocalcemia" OR "Hypocalcemias"))</p> |
